# Supplementary material for: Towards modelling of corrugation ridges at ice-sheet grounding lines
Source: Copernicus journal article supplement (doi:10.5194/tc-17-2645-2023), 2023-07-11
Supplement: Supplementary file 1 [file tc-17-2645-2023-supplement.zip]

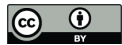

## *Supplement of*

# **Towards modelling of corrugation ridges at ice-sheet grounding lines**

**Kelly A. Hogan et al.**

*Correspondence to:* Kelly A. Hogan (kelgan@bas.ac.uk)

- tc-17-2645-2023-supplement-title-page.pdf
- tc-2022-222-supplement-060723
  - Hoganetal\_Towardsmodellingofcorrugationridges\_SuppInfo\_270623.docx
  - extrusion\_compression\_model.mp4
  - extrusion\_flux\_model.mp4
  - extrusion\_model\_s1.m
  - flux\_only\_model.mp4
  - flux\_only\_model\_s1.m
  - resuspension\_model.mp4
  - resuspension\_model\_s1.m
  - runs\_and\_plots\_s1.m

The copyright of individual parts of the supplement might differ from the article licence.
